# Supplementary material
Source: Copernicus journal article supplement (doi:10.5194/egusphere-2026-3794)
Supplement: Supplementary file 1 [file egusphere-2026-3794-supplement.pdf]

*Supplement of*

**Towards harmonized measurements of condensable vapors: insights from the intercomparison of six chemical ionization mass spectrometers at a boreal forest site**

5 Cecilia Righi et al.

*Correspondence to:* Cecilia Righi ([cecilia.righi@helsinki.fi](mailto:cecilia.righi@helsinki.fi)), Nina Sarnela ([nina.sarnela@helsinki.fi](mailto:nina.sarnela@helsinki.fi))

## S1 Abstract – description of the supporting material

This Supporting Information provides additional material to clarify and extend the analysis presented in the manuscript text, including supporting figures and tables. It is organized into Sections S1–S13: S1 Abstract – description of the supporting material, S2 ACTRIS CI-FI1 campaign timeline, S3 SmartSMEAR metadata, S4 Atmospheric Pressure interface Time-of-Flight mass spectrometer, S5 Peak lists, S6 Inlet tube losses, S7 Sulfuric acid calibration setup, S8 Equations used for the analysis of bromide mode data, S9 Considerations on the application of the transmission correction factor, S10 Measurements in nitrate mode – additional species, S11 Measurements in nitrate mode – correlation analysis, S12 Measurements in bromide mode – calibration factor, S13 Measurements in bromide mode – correlation analysis, S14 Measurements in different reagent ion modes: nitrate, bromide, and iodide – additional species, S15 References.

## S2 ACTRIS CI-FI1 campaign timeline

Figure S1 shows a timeline of the ACTRIS CI-FI1 campaign.

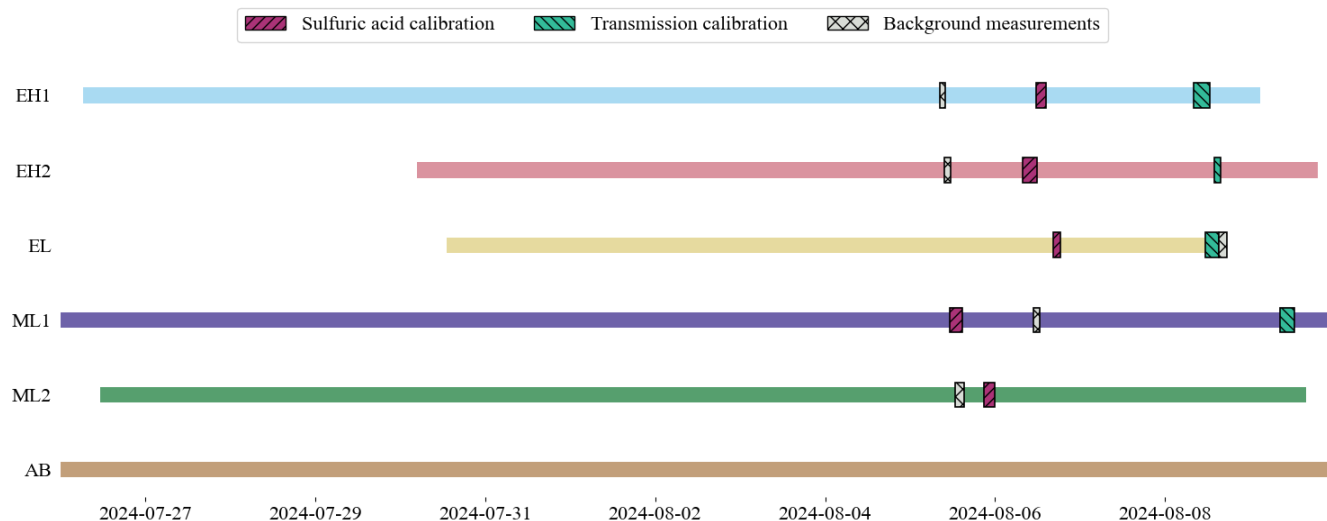

20 **Figure S1** Schematic timeline of the ACTRIS CI-FI1 campaign. The horizontal bars indicate the time span during which each instrument was deployed, and are colored for better contrast. The figure highlights the timing of sulfuric acid calibrations (magenta), transmission calibrations (green), and background measurements (grey), performed during the campaign. Transmission calibration on ML2 was performed post-campaign in the ACTRIS Laboratory of the University of Helsinki.

## S3 SmartSMEAR metadata

25 Table S1 provides metadata for the meteorological data retrieved from the SmartSMEAR database (<https://smear.avaa.csc.fi/>, last access: 13 January 2026) for the SMEAR II station during the measurement campaign period. These data were used to support the interpretation of the measurements from the instruments used in this study.

**Table S1** Metadata of the meteorological variables retrieved from the SmartSMEAR database for the SMEAR II station during the campaign period.

|             |                                                                                                                                                             |                                      |                                                                           |                                                                                                                                                                                                                                                                                                        |
|-------------|-------------------------------------------------------------------------------------------------------------------------------------------------------------|--------------------------------------|---------------------------------------------------------------------------|--------------------------------------------------------------------------------------------------------------------------------------------------------------------------------------------------------------------------------------------------------------------------------------------------------|
| title       | Air temperature<br>16.8 m (2)                                                                                                                               | Relative humidity<br>16.8 m          | Precipitation                                                             | UVB radiation                                                                                                                                                                                                                                                                                          |
| tableId     | HYY_META                                                                                                                                                    | HYY_META                             | HYY_META                                                                  | HYY_META                                                                                                                                                                                                                                                                                               |
| name        | Tmm168                                                                                                                                                      | RH168                                | Precipacc                                                                 | UV_B                                                                                                                                                                                                                                                                                                   |
| description | Air temperature at 16.8 m height measured with Pt100 inside Rotronic RS12T/RS24T radiation shield, inconsistent with the old 4.2-67.2 m temperature profile | Relative humidity at 16.8 m height   | Precipitation (liquid water equivalent) accumulated during previous 1 min | Ultraviolet B radiation in wavelength range 280-315 nm at 18 m height (radiation tower 1997-2/2017) or 35 m height (35 m tower 2/2017-), data until 2023 converted from erythemally weighted UVB to unweighted UVB with factor 7.55, high relative uncertainty at solar elevation angle of <20 degrees |
| unit        | °C                                                                                                                                                          | %                                    | mm                                                                        | W m <sup>-2</sup>                                                                                                                                                                                                                                                                                      |
| source      | Pt100 inside Rotronic shield                                                                                                                                | Rotronic MP102H RH sensor, mastmet33 | Vaisala FD12P weather sensor at 18 m height                               | Solar Light SL501A (-2023) or K&Z SUV-B (2024-)                                                                                                                                                                                                                                                        |
| periodStart | 2013-01-22T00:00:00.0                                                                                                                                       | 2013-01-22T15:31:00.0                | 2005-04-01T00:00:00.0                                                     | 1997-03-07T17:21:00.0                                                                                                                                                                                                                                                                                  |
| periodEnd   | null                                                                                                                                                        | null                                 | null                                                                      | null                                                                                                                                                                                                                                                                                                   |
| coverage    | 0                                                                                                                                                           | 0                                    | 0                                                                         | 0                                                                                                                                                                                                                                                                                                      |
| rights      | public                                                                                                                                                      | public                               | public                                                                    | public                                                                                                                                                                                                                                                                                                 |
| mandatory   | FALSE                                                                                                                                                       | FALSE                                | FALSE                                                                     | FALSE                                                                                                                                                                                                                                                                                                  |
| derivative  | FALSE                                                                                                                                                       | FALSE                                | FALSE                                                                     | FALSE                                                                                                                                                                                                                                                                                                  |
| timestamp   | 2020-06-30T11:31:43                                                                                                                                         | 2020-12-22T13:33:07                  | 2021-03-08T07:49:55                                                       | 2024-10-04T12:41:42                                                                                                                                                                                                                                                                                    |
| category    | Meteorology                                                                                                                                                 | Meteorology                          | Meteorology                                                               | Radiation                                                                                                                                                                                                                                                                                              |

## 30 S4 Atmospheric Pressure interface Time-of-Flight mass spectrometer

The Atmospheric Pressure interface Time-of-Flight (APi-ToF) mass spectrometer is a high-resolution instrument capable of detecting ions sampled at atmospheric pressure (Junninen et al., 2010). Once the sampled ions enter the APi section through a 0.3 mm pinhole at a flow rate of  $\sim 0.8 \text{ L min}^{-1}$ , neutral molecules are gradually pumped away, while the ions are focused at the center of the flow and guided from atmospheric pressure to the high vacuum of the ToF chamber ( $\sim 10^{-6}$  mbar) via three  
35 differentially pumped stages. This gradual pressure drop helps prevent the loss of ions that could result from abrupt decompression. In the ToF chamber, ions are accelerated by a pulsed electric field, and their  $m/z$  are determined by measuring the time required to traverse a field-free region and reach the detector. Detection is performed using two microchannel plates (MCPs), each consisting of a dense array of microscopic channels that act as electron multipliers: when ions collide with the MCP surface, they generate an initial pulse of electrons, which then cascade through successive  
40 collisions along the channel walls, amplifying the signal. The resulting electron current is collected at the anode. Finally, data acquisition is carried out using either a time-to-digital converter, which records the arrival time of each ion exceeding a certain threshold, or an analog-to-digital converter, which continuously measures the ion signal intensity.

## S5 Peak lists

This section presents the peak lists used for the comparison of the CI-APi-ToFs during the measurement campaign. Separate  
45 tables are provided for instruments operating in nitrate ( $\text{NO}_3^-$ ), bromide ( $\text{Br}^-$ ), and iodide ( $\text{I}^-$ ) mode. In addition, tables listing the additional peaks included to account for the enhanced sensitivity of bromide toward less oxidized compounds are provided for both ionization modes. For convenience, nitrophenol is included within the group of strong organic and inorganic acids (HA), although it should be noted that it is not strictly a strong acid, given its relatively high  $\text{pK}_a$  ( $\sim 7.15$ ). Nevertheless, nitrophenol can be efficiently detected in  $\text{NO}_3^-$  mode and is commonly regarded as a marker compound for  
50 biomass burning.

**Table S2** Peak list selected for the instruments operating in nitrate ( $\text{NO}_3^-$ ) mode. The monoisotopic mass (Th) corresponds to the exact mass of the detected ion. The last column indicates the species or chemical group assigned to each peak. In addition to highly oxygenated organic molecules (HOMs), semi-volatile organic compounds (SVOCs) were included to account for less oxidized organic compounds detectable in  $\text{NO}_3^-$  mode. The volatility of HOMs and SVOCs was estimated using the parametrization of Donahue et al. (2011), updated  
55 by Mohr et al. (2019), defined at reference temperature of 300 K.

| Ion                                        | Monoisotopic Mass (Th) | Volatility | Species / Group           |
|--------------------------------------------|------------------------|------------|---------------------------|
| $\text{NO}_3^-$                            | 61.988                 |            | reagent ion               |
| $(\text{H}_2\text{O}) \cdot \text{NO}_3^-$ | 79.999                 |            | reagent ion               |
| $\text{CH}_3\text{SO}_3^-$                 | 94.981                 |            | methanesulfonic acid / HA |
| $\text{HSO}_4^-$                           | 96.960                 |            | sulfuric acid             |
| $\text{C}_3\text{H}_3\text{O}_4^-$         | 103.004                |            | malonic acid / HA         |
| $(\text{HNO}_3) \cdot \text{NO}_3^-$       | 124.984                |            | reagent ion               |

|                                     |         |      |                                           |
|-------------------------------------|---------|------|-------------------------------------------|
| $C_6H_4NO_3^-$                      | 138.020 |      | nitrophenol / HA                          |
| $(CH_4SO_3) \cdot NO_3^-$           | 157.976 |      | methanesulfonic acid / HA                 |
| $(HNO_3) \cdot HSO_4^-$             | 159.956 |      | sulfuric acid                             |
| $(C_3H_4O_4) \cdot NO_3^-$          | 165.999 |      | malonic acid / HA                         |
| $IO_3^-$                            | 174.890 |      | iodic acid / HA                           |
| $(HNO_3)_2 \cdot NO_3^-$            | 187.980 |      | reagent ion                               |
| $(H_2SO_4) \cdot HSO_4^-$           | 194.927 |      | sulfuric acid                             |
| $(C_6H_5NO_3) \cdot NO_3^-$         | 201.015 |      | nitrophenol / HA                          |
| $(HIO_3) \cdot NO_3^-$              | 237.885 |      | iodic acid / HA                           |
| $(C_{10}H_{14}O_3) \cdot NO_3^-$    | 244.083 | SVOC | closed shell non-nitrate monomers / SVOC  |
| $(C_{10}H_{16}O_3) \cdot NO_3^-$    | 246.098 | SVOC | closed shell non-nitrate monomers / SVOC  |
| $(C_{10}H_{14}O_4) \cdot NO_3^-$    | 260.078 | SVOC | closed shell non-nitrate monomers / SVOC  |
| $(C_{10}H_{15}O_4) \cdot NO_3^-$    | 261.085 | SVOC | organic peroxy radicals / SVOC            |
| $(C_{10}H_{16}O_4) \cdot NO_3^-$    | 262.093 | SVOC | closed shell non-nitrate monomers / SVOC  |
| $(C_{10}H_{16}O_5) \cdot NO_3^-$    | 278.088 | SVOC | closed shell non-nitrate monomers / SVOC  |
| $(C_{10}H_{14}O_6) \cdot NO_3^-$    | 292.067 | SVOC | closed shell non-nitrate monomers / SVOC  |
| $(H_2SO_4)_2 \cdot HSO_4^-$         | 292.895 |      | sulfuric acid                             |
| $(C_{10}H_{15}O_6) \cdot NO_3^-$    | 293.075 | SVOC | organic peroxy radicals / SVOC            |
| $(C_{10}H_{16}O_6) \cdot NO_3^-$    | 294.083 | SVOC | closed shell non-nitrate monomers / SVOC  |
| $(C_{10}H_{14}O_7) \cdot NO_3^-$    | 308.062 | LVOC | closed shell non-nitrate monomers / HOM   |
| $(C_{10}H_{16}O_7) \cdot NO_3^-$    | 310.078 | LVOC | closed shell non-nitrate monomers / HOM   |
| $(C_{10}H_{14}O_8) \cdot NO_3^-$    | 324.057 | LVOC | closed shell non-nitrate monomers / HOM   |
| $(C_{10}H_{15}O_8) \cdot NO_3^-$    | 325.065 | LVOC | organic peroxy radicals / HOM             |
| $(C_{10}H_{16}O_8) \cdot NO_3^-$    | 326.073 | LVOC | closed shell non-nitrate monomers / HOM   |
| $(C_{10}H_{15}O_8N) \cdot NO_3^-$   | 339.068 | LVOC | closed shell organonitrate monomers / HOM |
| $(C_{10}H_{14}O_9) \cdot NO_3^-$    | 340.052 | LVOC | closed shell non-nitrate monomers / HOM   |
| $(C_{10}H_{16}O_9) \cdot NO_3^-$    | 342.068 | LVOC | closed shell non-nitrate monomers / HOM   |
| $(C_{10}H_{15}O_9N) \cdot NO_3^-$   | 355.063 | LVOC | closed shell organonitrate monomers / HOM |
| $(C_{10}H_{14}O_{10}) \cdot NO_3^-$ | 356.047 | LVOC | closed shell non-nitrate monomers / HOM   |

|                                      |         |       |                                           |
|--------------------------------------|---------|-------|-------------------------------------------|
| $(C_{10}H_{15}O_{10}) \cdot NO_3^-$  | 357.055 | LVOC  | organic peroxy radicals / HOM             |
| $(C_{10}H_{16}O_{10}) \cdot NO_3^-$  | 358.063 | LVOC  | closed shell non-nitrate monomers / HOM   |
| $(C_{10}H_{14}O_{11}) \cdot NO_3^-$  | 372.042 | LVOC  | closed shell non-nitrate monomers / HOM   |
| $(C_{10}H_{16}O_{11}) \cdot NO_3^-$  | 374.058 | LVOC  | closed shell non-nitrate monomers / HOM   |
| $(C_{10}H_{15}O_{11}N) \cdot NO_3^-$ | 387.053 | LVOC  | closed shell organonitrate monomers / HOM |
| $(C_{19}H_{28}O_{11}) \cdot NO_3^-$  | 494.152 | ULVOC | dimers / HOM                              |
| $(C_{19}H_{28}O_{12}) \cdot NO_3^-$  | 510.146 | ULVOC | dimers / HOM                              |
| $(C_{20}H_{30}O_{12}) \cdot NO_3^-$  | 524.162 | ULVOC | dimers / HOM                              |
| $(C_{20}H_{32}O_{13}) \cdot NO_3^-$  | 542.173 | ULVOC | dimers / HOM                              |
| $(C_{20}H_{31}O_{13}N) \cdot NO_3^-$ | 555.168 | ULVOC | nitrate dimers / HOM                      |
| $(C_{20}H_{30}O_{14}) \cdot NO_3^-$  | 556.152 | ULVOC | dimers / HOM                              |
| $(C_{20}H_{32}O_{15}) \cdot NO_3^-$  | 574.162 | ULVOC | dimers / HOM                              |
| $(C_{20}H_{30}O_{16}) \cdot NO_3^-$  | 588.142 | ULVOC | dimers / HOM                              |
| $(C_{20}H_{30}O_{18}) \cdot NO_3^-$  | 620.132 | ULVOC | dimers / HOM                              |

60 **Table S3** Peak list selected for the instruments operating in bromide ( $Br^-$ ) mode. The monoisotopic mass (Th) corresponds to the exact mass of the detected ion. The last column indicates the species or chemical group assigned to each peak. In addition to highly oxygenated organic molecules (HOMs), semi-volatile organic compounds (SVOCs) were included to account for less oxidized organic compounds detectable in  $NO_3^-$  mode. The volatility of HOMs and SVOCs was estimated using the parametrization of Donahue et al. (2011), updated by Mohr et al. (2019), defined at reference temperature of 300 K.

| Ion                      | Monoisotopic Mass (Th) | Volatility | Species / Group           |
|--------------------------|------------------------|------------|---------------------------|
| $Br^-$                   | 78.919                 |            | reagent ion               |
| $CH_3SO_3^-$             | 94.981                 |            | methanesulfonic acid / HA |
| $(H_2O) \cdot Br^-$      | 96.929                 |            | reagent ion               |
| $HSO_4^-$                | 96.960                 |            | sulfuric acid             |
| $C_3H_3O_4^-$            | 103.004                |            | malonic acid / HA         |
| $C_6H_4NO_3^-$           | 138.020                |            | nitrophenol / HA          |
| $IO_3^-$                 | 174.890                |            | iodic acid / HA           |
| $(CH_4SO_3) \cdot Br^-$  | 174.907                |            | methanesulfonic acid / HA |
| $(H_2SO_4) \cdot Br^-$   | 176.886                |            | sulfuric acid             |
| $(C_3H_4O_4) \cdot Br^-$ | 182.930                |            | malonic acid / HA         |

|                                    |         |       |                                           |
|------------------------------------|---------|-------|-------------------------------------------|
| $(C_6H_5NO_3) \cdot Br^-$          | 217.946 |       | nitrophenol / HA                          |
| $(HIO_3) \cdot Br^-$               | 254.816 |       | iodic acid / HA                           |
| $(C_{10}H_{14}O_3) \cdot Br^-$     | 261.013 | SVOC  | closed shell non-nitrate monomers / SVOC  |
| $(C_{10}H_{16}O_3) \cdot Br^-$     | 263.029 | SVOC  | closed shell non-nitrate monomers / SVOC  |
| $(C_{10}H_{14}O_4) \cdot Br^-$     | 277.008 | SVOC  | closed shell non-nitrate monomers / SVOC  |
| $(C_{10}H_{15}O_4) \cdot Br^-$     | 278.016 | SVOC  | organic peroxy radicals / SVOC            |
| $(C_{10}H_{16}O_4) \cdot Br^-$     | 279.024 | SVOC  | closed shell non-nitrate monomers / SVOC  |
| $(C_{10}H_{16}O_5) \cdot Br^-$     | 295.019 | SVOC  | closed shell non-nitrate monomers / SVOC  |
| $(C_{10}H_{14}O_6) \cdot Br^-$     | 308.998 | SVOC  | closed shell non-nitrate monomers / SVOC  |
| $(C_{10}H_{15}O_6) \cdot Br^-$     | 310.006 | SVOC  | organic peroxy radicals / SVOC            |
| $(C_{10}H_{16}O_6) \cdot Br^-$     | 311.014 | SVOC  | closed shell non-nitrate monomers / SVOC  |
| $(C_{10}H_{14}O_7) \cdot Br^-$     | 324.993 | LVOC  | closed shell non-nitrate monomers / HOM   |
| $(C_{10}H_{16}O_7) \cdot Br^-$     | 327.008 | LVOC  | closed shell non-nitrate monomers / HOM   |
| $(C_{10}H_{14}O_8) \cdot Br^-$     | 340.988 | LVOC  | closed shell non-nitrate monomers / HOM   |
| $(C_{10}H_{15}O_8) \cdot Br^-$     | 341.996 | LVOC  | organic peroxy radicals / HOM             |
| $(C_{10}H_{16}O_8) \cdot Br^-$     | 343.003 | LVOC  | closed shell non-nitrate monomers / HOM   |
| $(C_{10}H_{15}O_8N) \cdot Br^-$    | 355.999 | LVOC  | closed shell organonitrate monomers / HOM |
| $(C_{10}H_{14}O_9) \cdot Br^-$     | 356.983 | LVOC  | closed shell non-nitrate monomers / HOM   |
| $(C_{10}H_{16}O_9) \cdot Br^-$     | 358.998 | LVOC  | closed shell non-nitrate monomers / HOM   |
| $(C_{10}H_{15}O_9N) \cdot Br^-$    | 371.994 | LVOC  | closed shell organonitrate monomers / HOM |
| $(C_{10}H_{14}O_{10}) \cdot Br^-$  | 372.978 | LVOC  | closed shell non-nitrate monomers / HOM   |
| $(C_{10}H_{15}O_{10}) \cdot Br^-$  | 373.985 | LVOC  | organic peroxy radicals / HOM             |
| $(C_{10}H_{16}O_{10}) \cdot Br^-$  | 374.993 | LVOC  | closed shell non-nitrate monomers / HOM   |
| $(C_{10}H_{14}O_{11}) \cdot Br^-$  | 388.972 | LVOC  | closed shell non-nitrate monomers / HOM   |
| $(C_{10}H_{16}O_{11}) \cdot Br^-$  | 390.988 | LVOC  | closed shell non-nitrate monomers / HOM   |
| $(C_{10}H_{15}O_{11}N) \cdot Br^-$ | 403.983 | LVOC  | closed shell organonitrate monomers / HOM |
| $(C_{19}H_{28}O_{11}) \cdot Br^-$  | 511.082 | ULVOC | dimers / HOM                              |
| $(C_{19}H_{28}O_{12}) \cdot Br^-$  | 527.077 | ULVOC | dimers / HOM                              |
| $(C_{20}H_{30}O_{12}) \cdot Br^-$  | 541.093 | ULVOC | dimers / HOM                              |

|                                    |         |       |                      |
|------------------------------------|---------|-------|----------------------|
| $(C_{20}H_{32}O_{13}) \cdot Br^-$  | 559.103 | ULVOC | dimers / HOM         |
| $(C_{20}H_{31}O_{13}N) \cdot Br^-$ | 572.098 | ULVOC | nitrate dimers / HOM |
| $(C_{20}H_{30}O_{14}) \cdot Br^-$  | 573.082 | ULVOC | dimers / HOM         |
| $(C_{20}H_{32}O_{15}) \cdot Br^-$  | 591.093 | ULVOC | dimers / HOM         |
| $(C_{20}H_{30}O_{16}) \cdot Br^-$  | 605.072 | ULVOC | dimers / HOM         |
| $(C_{20}H_{30}O_{18}) \cdot Br^-$  | 637.062 | ULVOC | dimers / HOM         |

65 **Table S4** Peak list selected for the instruments operating in iodide ( $I^-$ ) mode. The monoisotopic mass (Th) corresponds to the exact mass of the detected ion. The last column indicates the species or chemical group assigned to each peak. The volatility of the organic compounds was estimated using the parametrization of Donahue et al. (2011), updated by Mohr et al. (2019), defined at reference temperature of 300 K.

| Ion                           | Monoisotopic Mass (Th) | Volatility | Species / Group                          |
|-------------------------------|------------------------|------------|------------------------------------------|
| $(C_{10}H_{14}O_3) \cdot I^-$ | 308.999                | SVOC       | closed shell non-nitrate monomers / SVOC |
| $(C_{10}H_{16}O_3) \cdot I^-$ | 311.015                | SVOC       | closed shell non-nitrate monomers / SVOC |
| $(C_{10}H_{14}O_4) \cdot I^-$ | 324.994                | SVOC       | closed shell non-nitrate monomers / SVOC |
| $(C_{10}H_{16}O_4) \cdot I^-$ | 327.010                | SVOC       | closed shell non-nitrate monomers / SVOC |
| $(C_{10}H_{16}O_5) \cdot I^-$ | 343.005                | SVOC       | closed shell non-nitrate monomers / SVOC |
| $(C_{10}H_{14}O_6) \cdot I^-$ | 356.984                | SVOC       | closed shell non-nitrate monomers / SVOC |

## S6 Inlet tube losses

70 Sulfuric acid wall losses are already accounted for in the model used to calculate sulfuric acid concentrations in the calibration experiment (Kürten et al., 2012); therefore, no additional correction factor is required when deriving concentrations from ion count rates. For species other than sulfuric acid, however, a factor  $C_{inlet}$  was introduced to account for losses in the inlet tube, calculated following the steps outlined below.

1. A gas diffusion coefficient,  $D_g$  ( $cm^2 s^{-1}$ ), is calculated for each compound as:

$$D_{AB} = \frac{1 \times 10^{-3} \cdot T^{1.75} \cdot \sqrt{\frac{1}{M_A} + \frac{1}{M_B}}}{p \cdot \left( \sqrt[3]{\sum_A v_i} + \sqrt[3]{\sum_B v_i} \right)^2}, \quad \text{Eq. (S1)}$$

75 where  $T$  (K) is the temperature,  $p$  (atm) is the pressure,  $M_{A,B}$  ( $g mol^{-1}$ ) are the molecular mass of air ( $A$ ) and the species of interest ( $B$ ),  $v_i$  ( $cm^3$ ) is the atomic diffusion volume to be summed over the atoms/groups of each diffusing species.  $v_i$  values have been derived from Fuller et al. (1969).

2. The frequency of wall collision,  $k$  ( $s^{-1}$ ) is calculated for each species using the following equation, assuming a first-order loss process:

$$k = 3.6 \cdot \frac{D_{AB}}{r_{in}^2}, \quad \text{Eq. (S2)}$$

where  $r_{in}$  (cm) is the radius of the inlet tube.

3. The residence time of the gas inside the inlet tube,  $Rt_{in}$  (s), is calculated as:

$$Rt_{in} = \frac{\pi \cdot r_{in}^2 \cdot l_{in}}{Q_{in} \cdot 10^3}, \quad \text{Eq. (S3)}$$

where  $l_{in}$  (cm) and  $Q_{in}$  ( $L \text{ min}^{-1}$ ) are the inlet tube length and flow rate, respectively.

4. The inlet tube loss is calculated for each species as:

$$L_{in} = 1 - e^{-k \cdot Rt_{in}}. \quad \text{Eq. (S4)}$$

5. Finally, the loss correction factor is calculated as:

$$C_{inlet} = \frac{1}{1 - L_{in}}. \quad \text{Eq. (S5)}$$

### S7 Sulfuric acid calibration setup

90 The calibration setup (Figure S2) was built based on the one presented by Kürten et al. (2012), with a few key differences. First, the dimensions of the box in our setup are  $14 \times 14 \times 8$  cm (L  $\times$  W  $\times$  H), with a 3/4"-diameter tube passing through the box, whereas Kürten et al. (2012) used a box of  $30 \times 20 \times 15$  cm and a 1/2"-diameter tube. Second, our setup does not include a photodiode for monitoring lamp stability.

The aluminum box houses a Pen-Ray® Hg Lamp (Analytik Jena US LLC), which serves as the UV source responsible for the photolysis of  $H_2O$  vapor and the in-situ production of  $H_2SO_4$  via the following reactions:

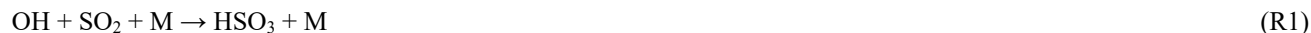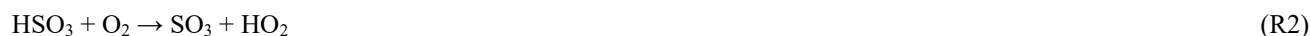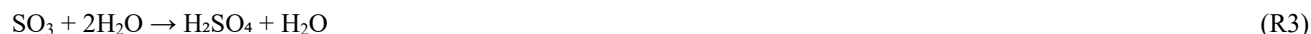

Four mass flow controllers (MFCs; Alicat Scientific MC-series) were used to regulate the inflow rates of sulfur dioxide, synthetic air, and nitrogen. The nitrogen flow was first split into three separate lines: (1) a carrier gas line, (2) a line for  $H_2O$  vapor production, and (3) a line for flushing the Hg lamp. The carrier gas and  $H_2O$  vapor lines were each regulated by a MFC, while the Hg-lamp flush was adjusted using a needle valve. To generate water vapor, the  $N_2$  flow from the second MFC passed through a bottle containing Milli-Q  $H_2O$ , which served as a humidifier. All tubing was made of Teflon® with a diameter of 6 mm, except for the 3/4"-diameter stainless steel tube passing through the box.

105 When connecting the calibration setup to the CI-APi-ToF, the nitrogen flush to the aluminum box was set to  $1.5 \text{ L min}^{-1}$ , and the lamp was switched on and allowed to warm up for approximately 90 min. After this period, the gas flow rates were adjusted via the MFCs so that their sum slightly exceeded the flow drawn into the inlet. Each calibration step lasted 10

minutes, after which the incoming wet nitrogen flow was modified while keeping the other parameters constant. The calibration experiment consisted of five steps, repeated twice.

110 Following Kürten et al. (2012), chemical actinometry was used to estimate the It-product needed for modeling H<sub>2</sub>SO<sub>4</sub> concentrations. For this study, the actinometry experiment was conducted in January 2024 at the ACTRIS Laboratory of the University of Helsinki. Further instructions and best practices for sulfuric acid calibration and actinometry experiment are available on GitHub at [https://github.com/ceciliarighi/ACTRIS\\_CiGas\\_condensable\\_vapors](https://github.com/ceciliarighi/ACTRIS_CiGas_condensable_vapors).

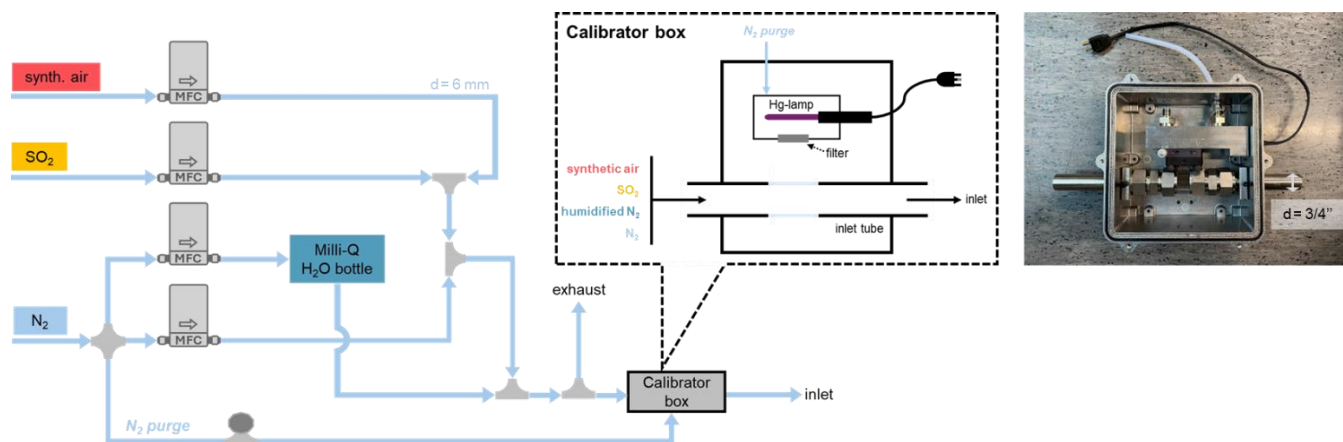

115

**Figure S2** Schematic diagram of the calibration setup used for the sulfuric acid calibration during the measurement campaign.

### S8 Equations used for the analysis of bromide mode data

Here we report the equations used to calculate the concentrations of sulfuric acid, acidic organic and inorganic compounds (HAs), and highly oxygenated organic molecules (HOMs) from bromide mode measurements. Equations (S6)–(S8) are  
 120 analogous to Eqs. (2)–(4) presented in the main text for nitrate mode data. In addition, Eq. (S9) describes the calculation of concentrations for the semi-volatile organic compounds (SVOCs) group.

$$[H_2SO_4] = \frac{HSO_4^- + H_2SO_4 \cdot Br^-}{Br^- + H_2O \cdot Br^-} \times C'_{SA}, \quad \text{Eq. (S6)}$$

$$[HA] = \frac{A^- + HA \cdot Br^-}{Br^- + H_2O \cdot Br^-} \times C'_{SA} \times C_{inlet}, \quad \text{Eq. (S7)}$$

$$[HOM] = \frac{HOM \cdot Br^-}{Br^- + H_2O \cdot Br^-} \times C'_{SA} \times C_{inlet} \times C_{trans}, \quad \text{Eq. (S8)}$$

$$125 \quad [SVOC] = \frac{HOM \cdot Br^-}{Br^- + H_2O \cdot Br^-} \times C'_{SA} \times C_{inlet} \times C_{trans}. \quad \text{Eq. (S9)}$$

As discussed in Sect. 2.2.5, Br<sup>-</sup> ionization is not fully kinetically limited for HOMs, implying lower charging efficiency than for sulfuric acid and HAs compared to NO<sub>3</sub><sup>-</sup>, which in turn exhibits lower sensitivity toward the less oxygenated SVOCs.

Equation (S10) is analogous to Eq. (1) in the manuscript text and was used to calculate the sulfuric acid signal normalized to the reagent ion signal during the sulfuric acid calibration experiments.

$$130 \quad S_{H_2SO_4} = \frac{HSO_4^- + H_2SO_4 \cdot Br^-}{Br^- + H_2O \cdot Br^-}. \quad \text{Eq. (S10)}$$

### S9 Considerations on the application of the transmission correction factor

Figure S3 Figure S3 visually supports the considerations discussed in Sect. 3.2 of the manuscript text, highlighting the effect of applying different correction factors to the data measured by the five CI-API-ToFs operating in nitrate mode.

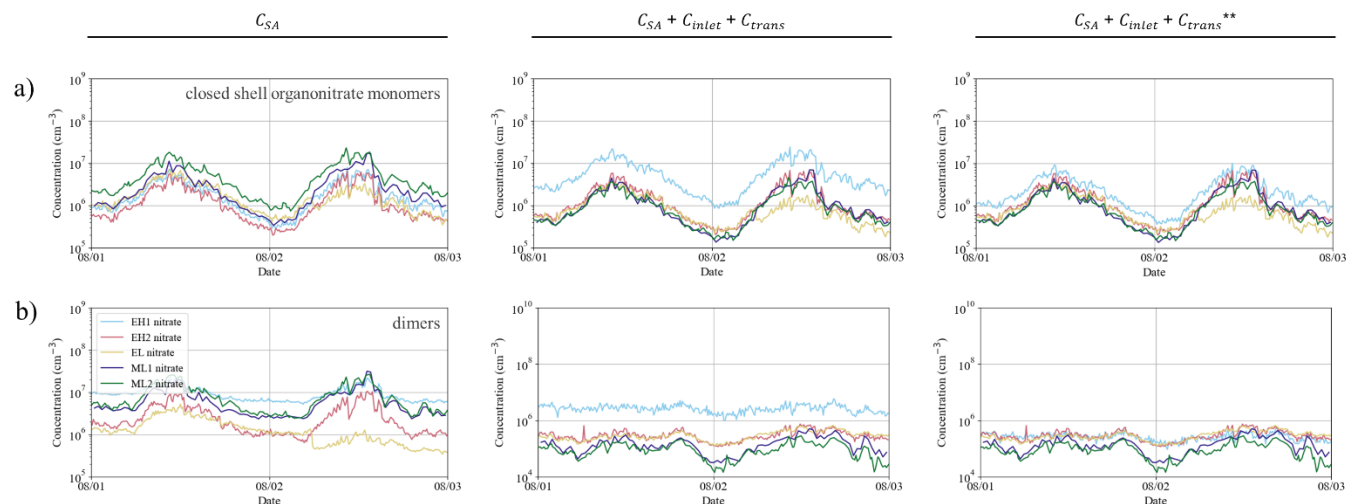

135 **Figure S3** Concentrations of (a) closed shell organonitrate monomers, and (b) dimers measured in nitrate mode by five mass spectrometers during 1-2 August 2024. For each panel, the left plot shows concentration time series obtained by applying only the sulfuric acid calibration factor ( $C_{SA}$ ); the central plot shows concentrations obtained by applying  $C_{SA}$ , inlet loss correction ( $C_{inlet}$ ), and transmission correction ( $C_{trans}$ ) to all instruments; right plot shows concentrations obtained by applying  $C_{SA}$ ,  $C_{inlets}$ , and  $C_{trans}$  to all instruments except EHI1.

140 Table S5, analogous to Table 5 for nitrate mode, show the results of the correlation analysis performed on concentrations of different HOM classes measured by ML1 and ML2 operating in  $Br^-$  modes on 27–31 July 2024.

**Table S5** Coefficients of determination ( $R^2$ ) and relative median absolute deviation (rMAD) calculated from concentrations of different HOM classes measured by ML1 and ML2 on 27–31 July 2024. Values are shown for cases (a) where only  $C'_{SA}$  is applied, and (b) where  $C'_{SA}$ ,  $C_{inlets}$ , and  $C_{trans}$  are applied.

| HOM class                           | $R_a^2$ | $R_b^2$ | $rMAD_a$ [%] | $rMAD_b$ [%] |
|-------------------------------------|---------|---------|--------------|--------------|
| organic peroxy radicals             | 0.826   | 0.828   | 56.5         | 30.1         |
| closed shell non-nitrate monomers   | 0.785   | 0.782   | 25.4         | 14.3         |
| closed shell organonitrate monomers | 0.730   | 0.725   | 27.2         | 39.4         |

|                                 |       |       |      |      |
|---------------------------------|-------|-------|------|------|
| dimers                          | 0.132 | 0.131 | 94.4 | 88.5 |
| semi-volatile organic compounds | 0.877 | 0.853 | 22.3 | 6.1  |

## 145 S10 Measurements in nitrate mode – additional species

Figure S4 shows time series and box plots for additional HOM classes measured in nitrate mode on 1–2 August 2024, complementing Figure 5 of the manuscript text.

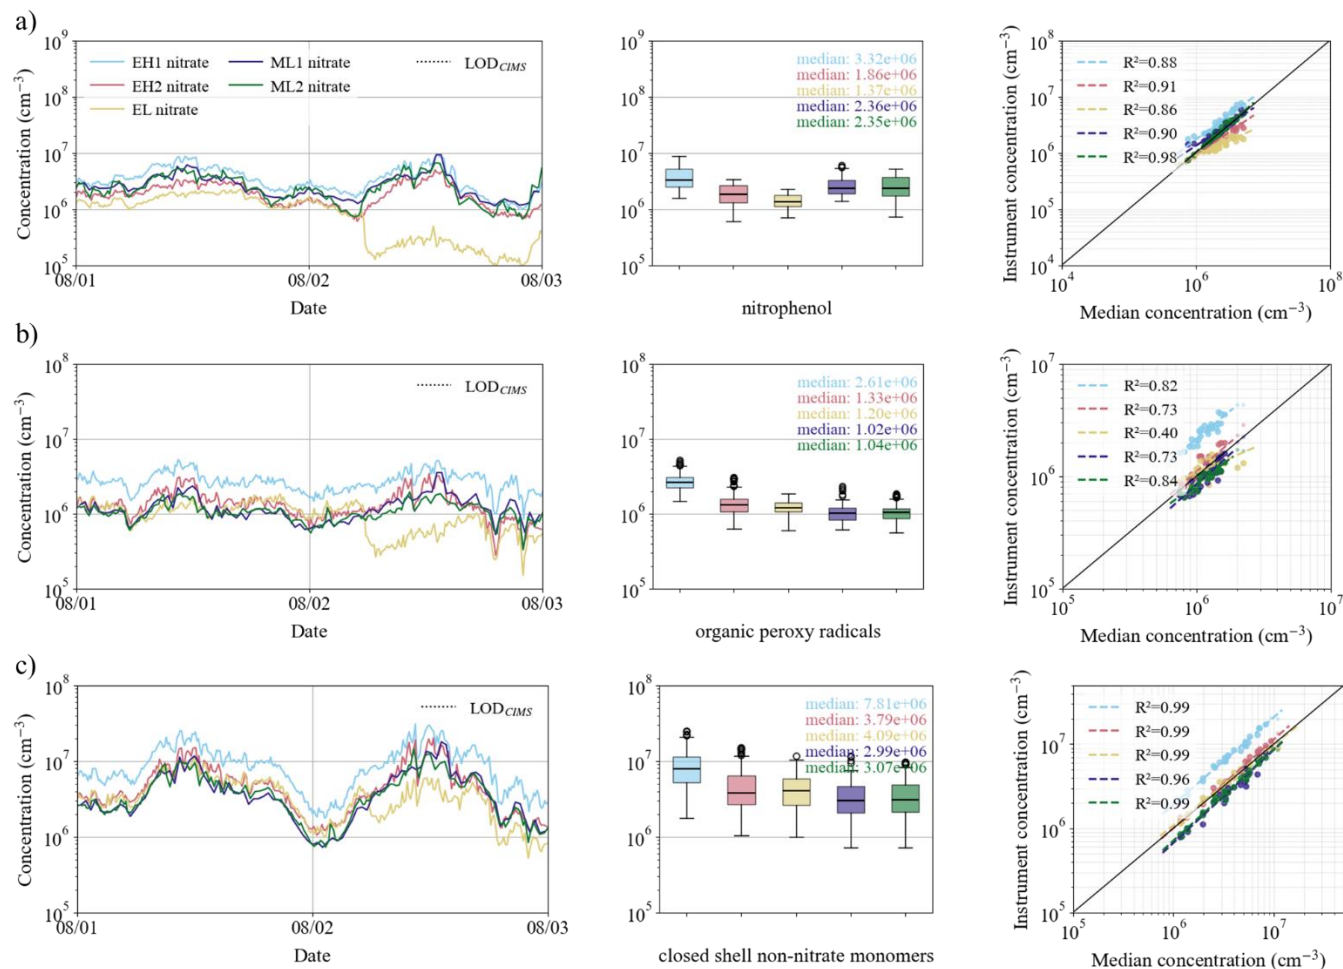

150 **Figure S4** Concentrations of (a) nitrophenol, (b) organic peroxy radicals, and (c) closed-shell non-nitrate monomers measured in nitrate  
155 mode by five mass spectrometers during 1–2 August 2024. For each panel, the left plot shows concentration time series, with instrument-  
specific LOD values indicated by dotted horizontal lines. The central plot shows a box plot summarizing the distributions over the same  
period; boxes indicate the interquartile range, horizontal lines indicate the median, whiskers represent the non-outlier range, and empty  
circles denote outliers. Data points below LOD are excluded from the box plot. The right plot shows hourly median concentrations  
measured by each instrument against the hourly median concentration across all five instruments. Dashed lines indicate log–log linear  
regressions for each instrument, with the corresponding coefficient of determination ( $R^2$ ) reported in the legend. Points below the  
corresponding LOD are shown as crosses (X), while outliers are plotted as smaller semi-transparent points. The abrupt shift in the EL time

series occurring around 05:40 on 2 August was caused by an issue encountered while adjusting the nitric acid flow mixed with the sheath flow.

### S11 Measurements in nitrate mode – correlation analysis

160 Table S6-Table S7, analogous to Table 6 in the manuscript text, report the results of the correlation analysis for the species targeted in  $\text{NO}_3^-$  mode based on data recorded by the five CI-APi-ToFs. In Table S6, concentrations were calculated by applying only  $C_{SA}$  to all species. In Table S7 and Table S8, concentrations were calculated by applying  $C_{SA}$ ,  $C_{inlet}$  and  $C_{trans}$ ; however, in the latter, data from EH1 were excluded from the correlation analysis to assess whether some of the low  $R^2$  values could be attributed to the different behavior of this instrument in specific m/z ranges.

165 **Table S6** Statistical parameters of the correlation analysis for the species measured in nitrate mode based on data recorded by the five CI-APi-ToFs.  $R^2$  is the coefficient of determination, p is the probability value, and parameters a and b are the slope and the offset of the linear fit, respectively. Concentrations were calculated by applying only  $C_{SA}$  to all species.

| Species                             | $R^2$ | p      | a     | b     |
|-------------------------------------|-------|--------|-------|-------|
| sulfuric acid                       | 0.577 | <0.001 | 0.897 | 0.525 |
| methanesulfonic acid                | 0.271 | <0.001 | 0.677 | 1.579 |
| malonic acid                        | 0.561 | <0.001 | 0.995 | 0.010 |
| iodic acid                          | 0.339 | <0.001 | 0.959 | 0.140 |
| nitrophenol                         | 0.314 | <0.001 | 0.666 | 2.068 |
| organic peroxy radicals             | 0.037 | <0.05  | 0.394 | 3.859 |
| closed shell non-nitrate monomers   | 0.625 | <0.001 | 0.951 | 0.343 |
| closed shell organonitrate monomers | 0.730 | <0.001 | 0.963 | 0.248 |
| dimers                              | 0.288 | <0.001 | 0.653 | 1.907 |

170 **Table S7** Statistical parameters of the correlation analysis for the species measured in nitrate mode based on data recorded by the five CI-APi-ToFs.  $R^2$  is the coefficient of determination, p is the probability value, and parameters a and b are the slope and the offset of the linear fit, respectively. Concentrations were calculated by applying  $C_{SA}$ ,  $C_{inlet}$ , and  $C_{trans}$  to all species.

| Species              | $R^2$ | p      | a     | b     |
|----------------------|-------|--------|-------|-------|
| sulfuric acid        | 0.577 | <0.001 | 0.897 | 0.525 |
| methanesulfonic acid | 0.110 | <0.001 | 0.587 | 2.188 |
| malonic acid         | 0.450 | <0.001 | 0.923 | 0.549 |
| iodic acid           | 0.088 | <0.001 | 0.599 | 1.815 |
| nitrophenol          | 0.433 | <0.001 | 0.815 | 1.185 |

|                                     |       |        |        |       |
|-------------------------------------|-------|--------|--------|-------|
| organic peroxy radicals             | 0.012 | >0.05  | 0.303  | 4.349 |
| closed shell non-nitrate monomers   | 0.415 | <0.001 | 0.917  | 0.644 |
| closed shell organonitrate monomers | 0.555 | <0.001 | 0.956  | 0.369 |
| dimers                              | 0.003 | >0.05  | -0.186 | 6.395 |

175 **Table S8** Statistical parameters of the correlation analysis for the species measured in nitrate mode based on data recorded by four CI-APi-ToFs; EH1 data were excluded from the analysis.  $R^2$  is the coefficient of determination, p is the probability value, and parameters a and b are the slope and the offset of the linear fit, respectively. Concentrations were calculated by applying  $C_{SA}$ ,  $C_{inlet}$ , and  $C_{trans}$  to all species.

| Species                             | $R^2$ | p      | a      | b     |
|-------------------------------------|-------|--------|--------|-------|
| sulfuric acid                       | 0.379 | <0.001 | 0.711  | 1.514 |
| methanesulfonic acid                | 0.063 | <0.05  | 0.487  | 2.728 |
| malonic acid                        | 0.291 | <0.001 | 0.755  | 1.723 |
| iodic acid                          | 0.022 | >0.05  | 0.189  | 3.627 |
| nitrophenol                         | 0.681 | <0.001 | 0.829  | 1.057 |
| organic peroxy radicals             | 0.320 | <0.001 | 0.637  | 2.205 |
| closed shell non-nitrate monomers   | 0.831 | <0.001 | 0.934  | 0.435 |
| closed shell organonitrate monomers | 0.891 | <0.001 | 0.965  | 0.207 |
| dimers                              | 0.004 | >0.05  | -0.073 | 5.539 |

### S12 Measurements in bromide mode – calibration factor

180 Figure S5 reproduces the analysis presented in Figure 6 in the manuscript text, but with ML1 concentrations calculated using the sulfuric acid calibration factor derived during the campaign,  $C_{SA}$ , instead of the revised  $C'_{SA}$ . We decided to disregard this factor (1) because this calibration did not agree with the others performed on the same instrument, and (2) due to the behavior observed in Figure S5a. Specifically, ML1 and ML2 show a nearly identical response to temporal variations in SVOC concentrations, while their absolute concentrations are offset by an approximately constant factor. This systematic shift is particularly evident in the scatter plot, where the two datasets align closely but are displaced relative to one another.

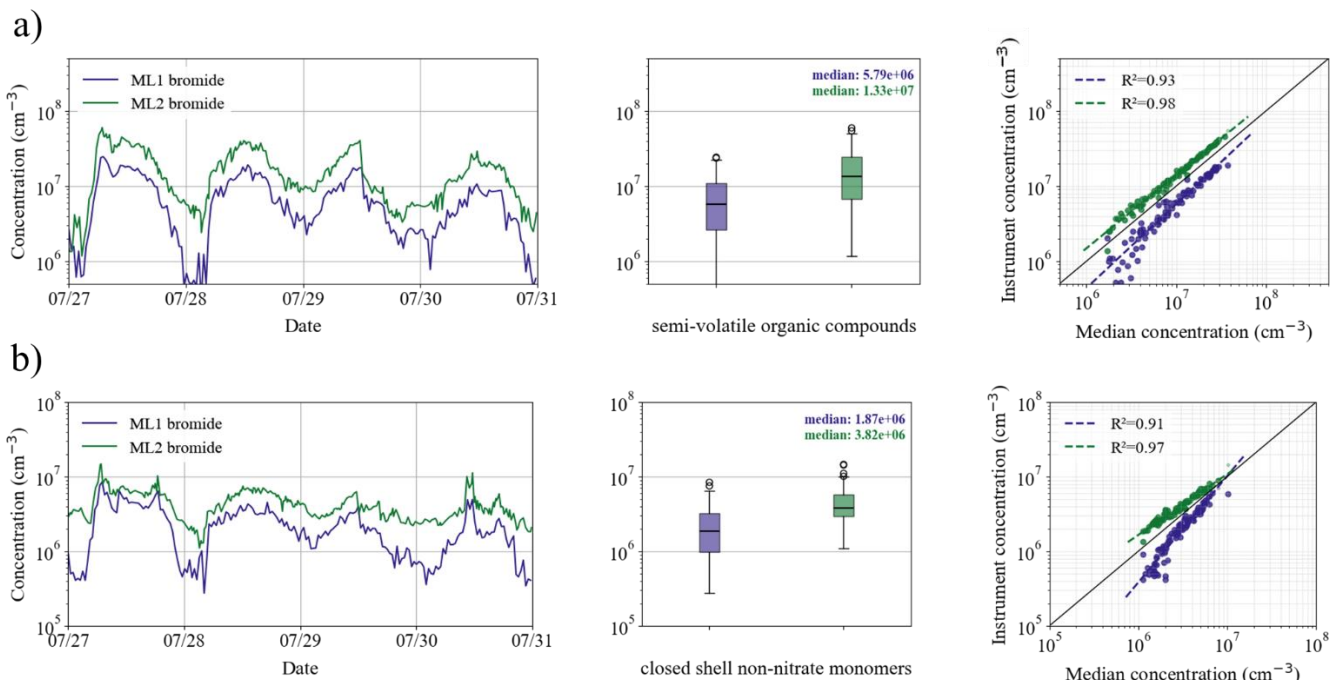

185 **Figure S5** Concentrations of (a) semi-volatile organic compounds, and (b) closed-shell non-nitrate monomers measured in bromide mode  
 190 by two mass spectrometers during 27-30 July 2024. For each panel, the left plot shows concentration time series, while the central plot  
 shows box plots summarizing the distributions over the same period. Boxes indicate the interquartile range, horizontal lines indicate the  
 median, whiskers represent the non-outlier range, and empty circles denote outliers. The right plot shows hourly median concentrations  
 measured by each instrument against the hourly mean concentration across the two instruments. Dashed lines indicate log-log linear  
 regressions for each instrument, with the corresponding coefficient of determination ( $R^2$ ) reported in the legend. Outliers are plotted as  
 smaller semi-transparent points. The concentrations have been calculated using the original  $C_{SA}$  derived for ML1 during the campaign, in  
 place of the revised  $C'_{SA}$ , as it is for Figure 6 in the manuscript text.

### S13 Measurements in bromide mode – correlation analysis

Table S9 and Table S10 report the results of the correlation analysis for the species targeted in  $Br^-$  mode based on data  
 recorded by ML1 and ML2. In Table S9, concentrations were calculated by applying only  $C_{SA}$  (or  $C'_{SA}$ ) to all species. In  
 195 Table S10, concentrations were calculated by applying  $C_{SA}$  (or  $C'_{SA}$ ),  $C_{inlet}$ , and  $C_{trans}$ .

**Table S9** Statistical parameters of the correlation analysis for the species measured in bromide mode based on data recorded by ML1 and  
 ML2.  $R^2$  is the coefficient of determination, p is the probability value, and parameters a and b are the slope and the offset of the linear fit,  
 respectively. Concentrations were calculated by applying only  $C_{SA}$  (or  $C'_{SA}$ ) to all species.

| Species                             | $R^2$ | p      | a     | b     |
|-------------------------------------|-------|--------|-------|-------|
| sulfuric acid                       | 0.557 | <0.001 | 0.812 | 1.201 |
| closed shell non-nitrate monomers   | 0.785 | <0.001 | 0.495 | 3.807 |
| closed shell organonitrate monomers | 0.730 | <0.001 | 0.277 | 4.615 |

200 **Table S10** Statistical parameters of the correlation analysis for the species measured in bromide mode based on data recorded by ML1 and ML2.  $R^2$  is the coefficient of determination,  $p$  is the probability value, and parameters  $a$  and  $b$  are the slope and the offset of the linear fit, respectively. Concentrations were calculated by applying  $C_{SA}$  (or  $C'_{SA}$ ),  $C_{inlets}$ , and  $C_{trans}$  to all species.

| Species                             | $R^2$ | $p$    | $a$   | $b$   |
|-------------------------------------|-------|--------|-------|-------|
| sulfuric acid                       | 0.557 | <0.001 | 0.812 | 1.201 |
| closed shell non-nitrate monomers   | 0.782 | <0.001 | 0.501 | 3.282 |
| closed shell organonitrate monomers | 0.725 | <0.001 | 0.273 | 4.023 |
| semi-volatile organic compounds     | 0.853 | <0.001 | 0.783 | 1.554 |

### S14 Measurements in different reagent ion modes: nitrate, bromide, and iodide – additional species

Figure S6 and Figure S7 extend the analysis shown in Figure 8 in the manuscript text to additional compounds.

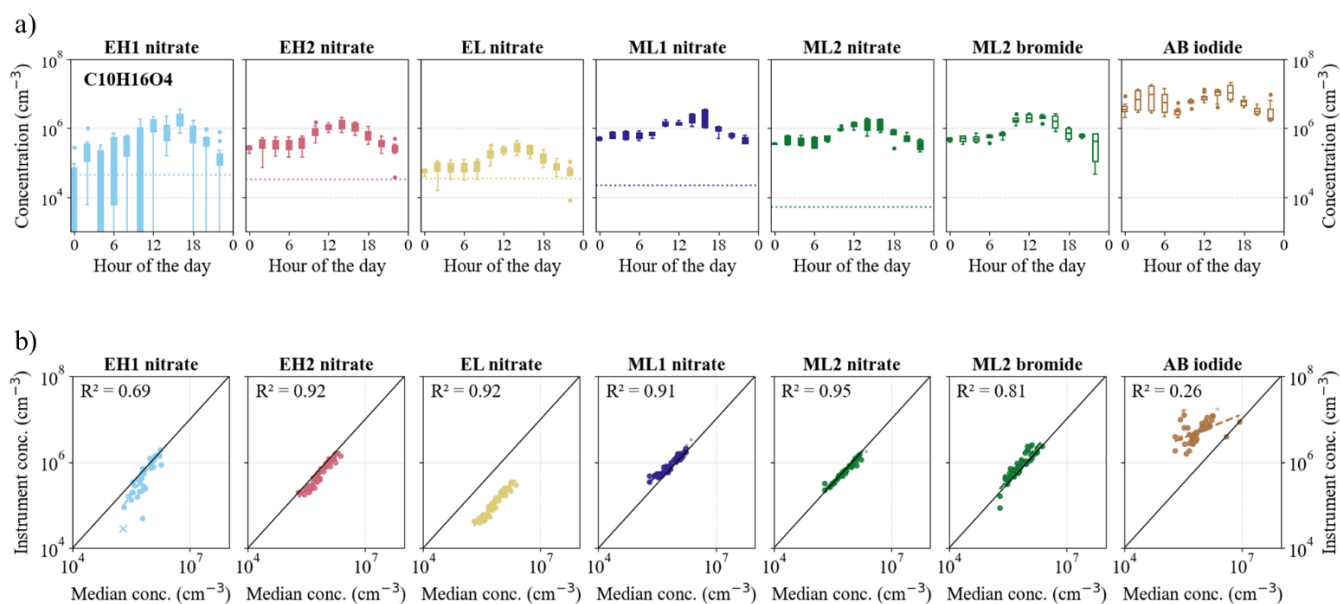

205

210

**Figure S6** (a) Box plots showing the diurnal variation of  $C_{10H_{16}O_4}$  based on measurements conducted on 1-2 August 2024. Data are from five instruments operating in nitrate mode (EH1, EH2, EL, ML1, ML2), one instrument operating in bromide mode (ML2), and one instrument operating in iodide mode (AB). Boxes indicate the interquartile range, whiskers represent the non-outlier range, and full circles denote outliers. (b) Scatter plots of hourly median concentrations showing, for each instrument and ionization mode combination, the concentrations measured by the individual instrument-mode against the median concentration measured across all instruments-mode combinations over the same period. Dashed lines indicate linear regressions for each instrument, with the corresponding coefficient of determination ( $R^2$ ) reported in the figure.

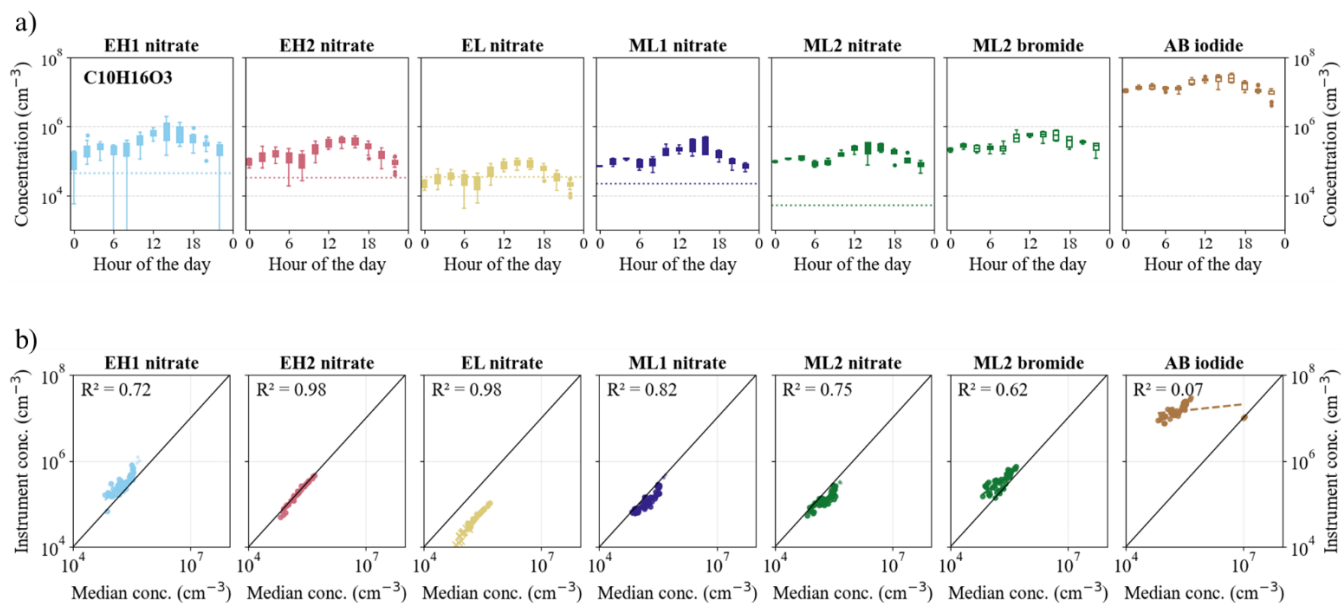

215 **Figure S7** (a) Box plots showing the diurnal variation of C<sub>10</sub>H<sub>16</sub>O<sub>3</sub> based on measurements conducted on 1-2 August 2024. Data are from  
 five instruments operating in nitrate mode (EH1, EH2, EL, ML1, ML2), one instrument operating in bromide mode (ML2), and one  
 instrument operating in iodide mode (AB). Boxes indicate the interquartile range, whiskers represent the non-outlier range, and full circles  
 denote outliers. (b) Scatter plots of hourly median concentrations showing, for each instrument and ionization mode combination, the  
 concentrations measured by the individual instrument-mode against the median concentration measured across all instruments-mode  
 combinations over the same period. Dashed lines indicate linear regressions for each instrument, with the corresponding coefficient of  
 220 determination (R<sup>2</sup>) reported in the figure.

## S15 References

- Donahue, N. M., Epstein, S. A., Pandis, S. N., and Robinson, A. L.: A two-dimensional volatility basis set: 1. organic-  
 aerosol mixing thermodynamics, *Atmos. Chem. Phys.*, 11, 3303–3318, <https://doi.org/10.5194/acp-11-3303-2011>, 2011.
- Fuller, E. N., Ensley, K., and Giddings, C. J.: Diffusion of Halogenated Hydrocarbons in Helium. The Effect of Structure on  
 225 Collision Cross Sections, *J. Phys. Chem.*, 73, 3679–3685, <https://doi.org/10.1021/j100845a020>, 1969.
- Junninen, H., Ehn, M., Petäjä, Luosujärvi, L., Kotiaho, T., Kostianen, R., Rohner, U., Gonin, M., Fuhrer, K., Kulmala, M.,  
 and Worsnop, D. R.: A high-resolution mass spectrometer to measure atmospheric ion composition, *Atmos. Meas. Tech.*, 3,  
 1039–1053, <https://doi.org/10.5194/amt-3-1039-2010>, 2010.
- Kürten, A., Rondo, L., Ehrhart, S., and Curtius, J.: Calibration of a chemical ionization mass spectrometer for the  
 230 measurement of gaseous sulfuric acid, *Journal of Physical Chemistry A*, 116, 6375–6386, <https://doi.org/10.1021/jp212123n>,  
 2012.
- Mohr, C., Thornton, J. A., Heitto, A., Lopez-Hilfiker, F. D., Lutz, A., Riipinen, I., Hong, J., Donahue, N. M., Hallquist, M.,  
 Petäjä, T., Kulmala, M., and Yli-Juuti, T.: Molecular identification of organic vapors driving atmospheric nanoparticle  
 growth, *Nat. Commun.*, 10, <https://doi.org/10.1038/s41467-019-12473-2>, 2019.
